# Supplementary material for: Identification and Preliminary Clinical Validation of Key Extracellular Proteins as the Potential Biomarkers in Hashimoto’s Thyroiditis by Comprehensive Analysis
Source: MDPI journal article supplement (doi:10.3390/biomedicines11123127), 2023-11-24
Supplement: s1 [file s1]

**Supplementary Table S2.** Characteristics of the study groups.

| Patient number | Group | Gender | Age (years) | Pathology of thyroid nodules | Pathology of thyroid tissues | FT3    | FT4    | TSH    | TPOAb    | TGAb     |
|----------------|-------|--------|-------------|------------------------------|------------------------------|--------|--------|--------|----------|----------|
| 1              | HT    | Female | 42          | nodular goiter               | HT                           | normal | normal | normal | positive | positive |
| 2              | HT    | Female | 55          | follicular adenoma           | HT                           | normal | normal | normal | positive | normal   |
| 3              | HT    | Female | 48          | nodular goiter               | HT                           | normal | normal | normal | positive | normal   |
| 4              | HT    | Female | 37          | nodular goiter               | HT                           | normal | normal | normal | normal   | normal   |
| 5              | HT    | Female | 23          | nodular goiter               | HT                           | normal | normal | normal | positive | positive |
| 6              | HT    | Female | 63          | nodular goiter               | HT                           | normal | normal | normal | positive | normal   |
| 7              | NC    | Female | 29          | nodular goiter               | normal                       | normal | normal | normal | normal   | normal   |
| 8              | NC    | Female | 36          | nodular goiter               | normal                       | normal | normal | normal | normal   | normal   |
| 9              | NC    | Female | 57          | nodular goiter               | normal                       | normal | normal | normal | normal   | normal   |
| 10             | NC    | Female | 45          | nodular goiter               | normal                       | normal | normal | normal | normal   | normal   |
| 11             | NC    | Female | 40          | nodular goiter               | normal                       | normal | normal | normal | normal   | normal   |

Abbreviations: HT, Hashimoto's thyroiditis. NC, normal control. FT3, free triiodothyronine. FT4, free thyroxine. TSH, thyroid-stimulating hormone. TPOAb, thyroid peroxidase antibody. TGAb, thyroglobulin antibody.
