# Supplementary material for: Identification and Preliminary Clinical Validation of Key Extracellular Proteins as the Potential Biomarkers in Hashimoto’s Thyroiditis by Comprehensive Analysis
Source: MDPI journal article supplement (doi:10.3390/biomedicines11123127), 2023-11-24
Supplement: s1 [file s1]

**Supplementary Table S1.** Details of the PPI network of EP-DEGs constructed by the STRING database.

| #node1   | node2  | node1_string_id      | node2_string_id      | neighborhood_<br>on_chromosome | gene_fusion | phylogenetic_<br>cooccurrence | homo coexpression | coexpression | experimentally_<br>determined_<br>interaction | database_<br>annotated | automated_text_<br>mining | combined_<br>score |
|----------|--------|----------------------|----------------------|--------------------------------|-------------|-------------------------------|-------------------|--------------|-----------------------------------------------|------------------------|---------------------------|--------------------|
| ADAMDEC1 | CXCL9  | 9606.ENSP00000256412 | 9606.ENSP00000354901 | 0                              | 0           | 0                             | 0                 | 0.335        | 0                                             | 0                      | 0.266                     | 0.491              |
| ADAMDEC1 | CXCL13 | 9606.ENSP00000256412 | 9606.ENSP00000286758 | 0                              | 0           | 0                             | 0                 | 0.492        | 0                                             | 0                      | 0.242                     | 0.598              |
| APOC1    | SAA2   | 9606.ENSP00000465356 | 9606.ENSP00000436126 | 0                              | 0           | 0                             | 0                 | 0.049        | 0                                             | 0.54                   | 0.407                     | 0.717              |
| CCL5     | GZMK   | 9606.ENSP00000474412 | 9606.ENSP00000231009 | 0                              | 0           | 0                             | 0                 | 0.561        | 0                                             | 0                      | 0.675                     | 0.851              |
| CCL5     | LY96   | 9606.ENSP00000474412 | 9606.ENSP00000284818 | 0                              | 0           | 0                             | 0                 | 0.064        | 0                                             | 0                      | 0.434                     | 0.448              |
| CCL5     | CXCL13 | 9606.ENSP00000474412 | 9606.ENSP00000286758 | 0                              | 0           | 0                             | 0                 | 0.144        | 0                                             | 0.5                    | 0.905                     | 0.956              |
| CCL5     | CXCL10 | 9606.ENSP00000474412 | 9606.ENSP00000305651 | 0                              | 0           | 0                             | 0                 | 0.362        | 0.994                                         | 0.5                    | 0.95                      | 0.999              |
| CCL5     | CXCL11 | 9606.ENSP00000474412 | 9606.ENSP00000306884 | 0                              | 0           | 0                             | 0                 | 0.355        | 0.994                                         | 0.5                    | 0.885                     | 0.999              |
| CCL5     | CXCL9  | 9606.ENSP00000474412 | 9606.ENSP00000354901 | 0                              | 0           | 0                             | 0                 | 0.371        | 0.994                                         | 0.5                    | 0.948                     | 0.999              |
| CCL5     | XCL1   | 9606.ENSP00000474412 | 9606.ENSP00000356792 | 0                              | 0           | 0                             | 0.803             | 0.215        | 0.994                                         | 0                      | 0.285                     | 0.996              |
| CCL5     | SAA2   | 9606.ENSP00000474412 | 9606.ENSP00000436126 | 0                              | 0           | 0                             | 0                 | 0.074        | 0                                             | 0                      | 0.657                     | 0.669              |
| CXCL10   | GZMK   | 9606.ENSP00000305651 | 9606.ENSP00000231009 | 0                              | 0           | 0                             | 0                 | 0.149        | 0                                             | 0                      | 0.355                     | 0.428              |
| CXCL10   | LY96   | 9606.ENSP00000305651 | 9606.ENSP00000284818 | 0                              | 0           | 0                             | 0                 | 0.126        | 0                                             | 0                      | 0.418                     | 0.469              |
| CXCL10   | CXCL13 | 9606.ENSP00000305651 | 9606.ENSP00000286758 | 0                              | 0           | 0                             | 0                 | 0.201        | 0                                             | 0.9                    | 0.939                     | 0.994              |
| CXCL10   | SAA2   | 9606.ENSP00000305651 | 9606.ENSP00000436126 | 0                              | 0           | 0                             | 0                 | 0.056        | 0                                             | 0                      | 0.777                     | 0.78               |
| CXCL10   | XCL1   | 9606.ENSP00000305651 | 9606.ENSP00000356792 | 0                              | 0           | 0                             | 0                 | 0.19         | 0.994                                         | 0                      | 0.613                     | 0.997              |
| CXCL10   | CXCL9  | 9606.ENSP00000305651 | 9606.ENSP00000354901 | 0                              | 0           | 0                             | 0.856             | 0.836        | 0.994                                         | 0.9                    | 0.444                     | 0.999              |
| CXCL10   | CXCL11 | 9606.ENSP00000305651 | 9606.ENSP00000306884 | 0                              | 0           | 0                             | 0.811             | 0.824        | 0.994                                         | 0.9                    | 0.467                     | 0.999              |
| CXCL11   | CXCL13 | 9606.ENSP00000306884 | 9606.ENSP00000286758 | 0                              | 0           | 0                             | 0                 | 0.262        | 0                                             | 0.9                    | 0.839                     | 0.987              |
| CXCL11   | SAA2   | 9606.ENSP00000306884 | 9606.ENSP00000436126 | 0                              | 0           | 0                             | 0                 | 0.064        | 0                                             | 0                      | 0.563                     | 0.573              |
| CXCL11   | XCL1   | 9606.ENSP00000306884 | 9606.ENSP00000356792 | 0                              | 0           | 0                             | 0                 | 0.134        | 0.994                                         | 0                      | 0.507                     | 0.997              |
| CXCL11   | CXCL9  | 9606.ENSP00000306884 | 9606.ENSP00000354901 | 0                              | 0           | 0                             | 0.84              | 0.787        | 0.994                                         | 0.9                    | 0.451                     | 0.999              |
| CXCL13   | GZMK   | 9606.ENSP00000286758 | 9606.ENSP00000231009 | 0                              | 0           | 0                             | 0                 | 0.27         | 0                                             | 0                      | 0.46                      | 0.589              |
| CXCL13   | JCHAIN | 9606.ENSP00000286758 | 9606.ENSP00000440066 | 0                              | 0           | 0                             | 0                 | 0.173        | 0                                             | 0                      | 0.307                     | 0.402              |
| CXCL13   | FDCSP  | 9606.ENSP00000286758 | 9606.ENSP00000318437 | 0                              | 0           | 0                             | 0                 | 0.436        | 0                                             | 0                      | 0.203                     | 0.531              |

|        |        |                      |                      |   |   |   |   |       |       |     |       |       |
|--------|--------|----------------------|----------------------|---|---|---|---|-------|-------|-----|-------|-------|
| CXCL13 | SAA2   | 9606.ENSF00000286758 | 9606.ENSF00000436126 | 0 | 0 | 0 | 0 | 0.074 | 0     | 0   | 0.521 | 0.537 |
| CXCL13 | XCL1   | 9606.ENSF00000286758 | 9606.ENSF00000356792 | 0 | 0 | 0 | 0 | 0.125 | 0     | 0   | 0.524 | 0.565 |
| CXCL13 | CXCL9  | 9606.ENSF00000286758 | 9606.ENSF00000354901 | 0 | 0 | 0 | 0 | 0.435 | 0     | 0.9 | 0.937 | 0.996 |
| CXCL9  | GZMK   | 9606.ENSF00000354901 | 9606.ENSF00000231009 | 0 | 0 | 0 | 0 | 0.34  | 0     | 0   | 0.405 | 0.591 |
| CXCL9  | SAA2   | 9606.ENSF00000354901 | 9606.ENSF00000436126 | 0 | 0 | 0 | 0 | 0.061 | 0     | 0   | 0.558 | 0.567 |
| CXCL9  | XCL1   | 9606.ENSF00000354901 | 9606.ENSF00000356792 | 0 | 0 | 0 | 0 | 0.204 | 0.994 | 0   | 0.589 | 0.997 |
| GZMK   | JCHAIN | 9606.ENSF00000231009 | 9606.ENSF00000440066 | 0 | 0 | 0 | 0 | 0.226 | 0     | 0   | 0.294 | 0.43  |
| GZMK   | XCL1   | 9606.ENSF00000231009 | 9606.ENSF00000356792 | 0 | 0 | 0 | 0 | 0.274 | 0.051 | 0   | 0.593 | 0.695 |
| JCHAIN | LYZ    | 9606.ENSF00000440066 | 9606.ENSF00000261267 | 0 | 0 | 0 | 0 | 0.137 | 0     | 0   | 0.369 | 0.432 |
| LYZ    | MPEG1  | 9606.ENSF00000261267 | 9606.ENSF00000354335 | 0 | 0 | 0 | 0 | 0.324 | 0     | 0   | 0.57  | 0.697 |

---
